# Supplementary material
Source: Springer Nature journal article supplement (https://www.springermedizin.de/resource/supplementary/12960_2012_379_MOESM1_ESM.pdf/9569974)
Supplement: MOESM1 [file 9569974]

The pediatric service supply component score

Group 2

(Low urbanized and highly supplied)

113 SMAs

1453 → 1425

(57.0) (60.5)

Group 1

(Highly urbanized and highly supplied)

56 SMAs

4562 → 5313

(80.4) (95.6)

Group 3

(Low urbanized and low supplied)

114 SMAs

695 → 715

(31.9) (35.6)

Group 4

(Highly urbanized and low supplied)

86 SMAs

3127 → 3765

(40.3) (49.2)

The urbanization component score
